# Supplementary material for: BiOBr nanoplate-wrapped ZnO nanorod arrays for high performance photoelectrocatalytic application
Source: Royal Society of Chemistry journal article supplement (doi:10.1039/c5ra27310b), 2016-01-01
Supplement: c5ra27310b1.pdf [file c5ra27310b1.pdf]

## Supporting Information

BiOBr nanoplate-wrapped ZnO nanorod arrays for high performance photoelectrocatalytic application

Zhao-Qing Liu\*, Pan-Yong Kuang, Ren-Bin Wei, Nan Li, Yi-Bo Chen and Yu-Zhi Su\*

*School of Chemistry and Chemical Engineering/Guangzhou Key Laboratory for Environmentally Functional Materials and Technology*

*Guangzhou University; Guangzhou Higher Education Mega Center, Waihuan Xi Road No. 230, China 510006*

*Fax: 86-20-39366908; Tel: 86-20-39366908;*

*E-mail: [lzqgz@gzhu.edu.cn](mailto:lzqgz@gzhu.edu.cn) (Z. Q. Liu); [syzbox@gzhu.edu.cn](mailto:syzbox@gzhu.edu.cn) (Y. Z. Su)*

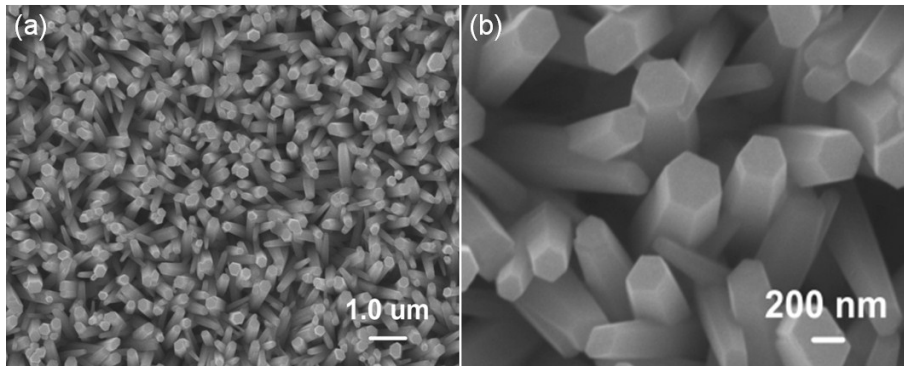

**Fig. S1** SEM images of the ZnO NRAs.

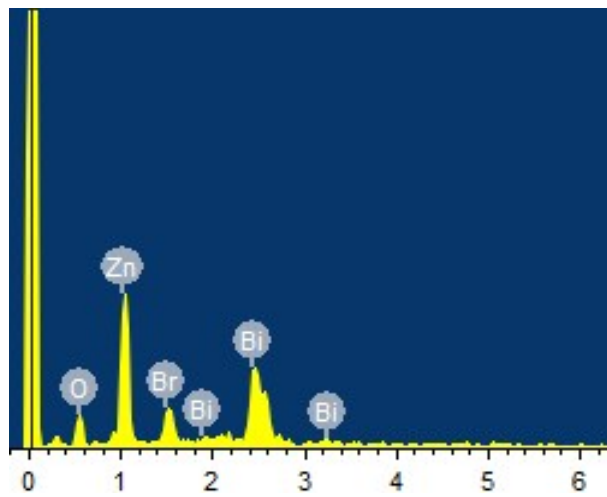

**Fig. S2** EDS spectrum of the ZnO/BiOBr heterostructure.

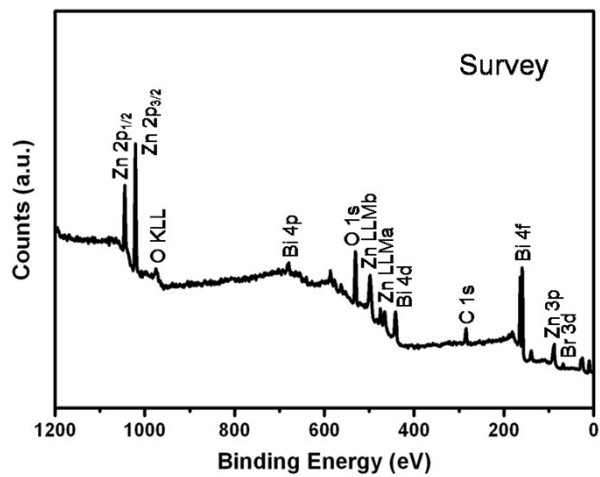

**Fig. S3** XPS survey spectrum of the ZnO/BiOBr heterostructure.

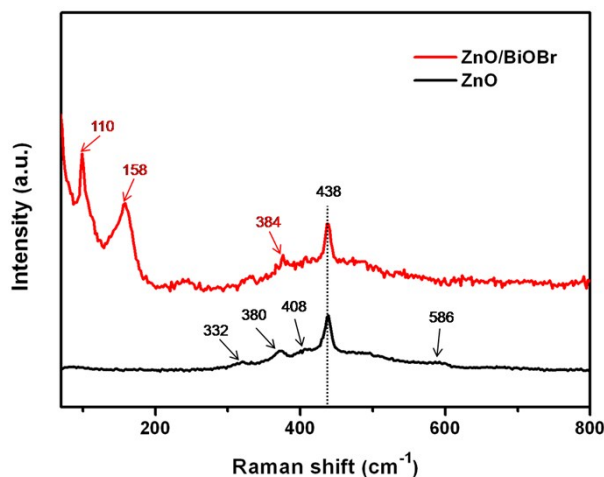

**Fig. S4** Raman spectra of pure ZnO and ZnO/BiOBr heterostructure.

Fig. S4 exhibits the Raman spectra of pure ZnO and ZnO/BiOBr heterostructure. The strong peak at  $438\text{ cm}^{-1}$  and other four weak peaks at  $332$ ,  $380$ ,  $408$  and  $586\text{ cm}^{-1}$  are correspondent to the  $E_2(\text{high})$ ,  $A_1(\text{TO})$ ,  $A_1(\text{TO})$ ,  $E_1(\text{TO})$  and  $E_1(\text{LO})$  mode in wurtzite structured ZnO.<sup>[S1,S2]</sup> The strong band observed at  $110\text{ cm}^{-1}$  for ZnO/BiOBr could be attributed to  $A_{1g}$  internal Bi-Br stretching mode, and the band at  $158\text{ cm}^{-1}$  could be ascribed to  $E_g$  internal Bi-Br stretching mode.<sup>[S3]</sup> Moreover, the weak band at  $384\text{ cm}^{-1}$  that generated by the motion of oxygen atoms is belongs to the  $B_{1g}$  mode.<sup>[S4]</sup> The above results can be regarded as the combination of ZnO and BiOBr in the products.

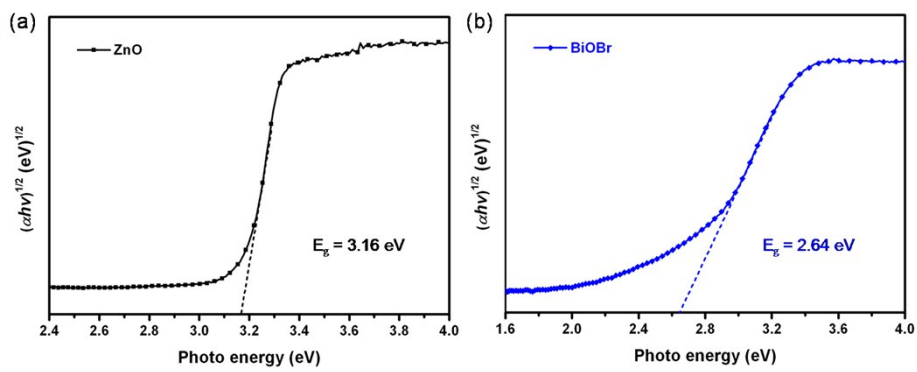

**Fig. S5** Plots of  $(\alpha h\nu)^{1/2}$  versus energy ( $h\nu$ ) for the band gap energy of the (a) ZnO and (b) BiOBr.

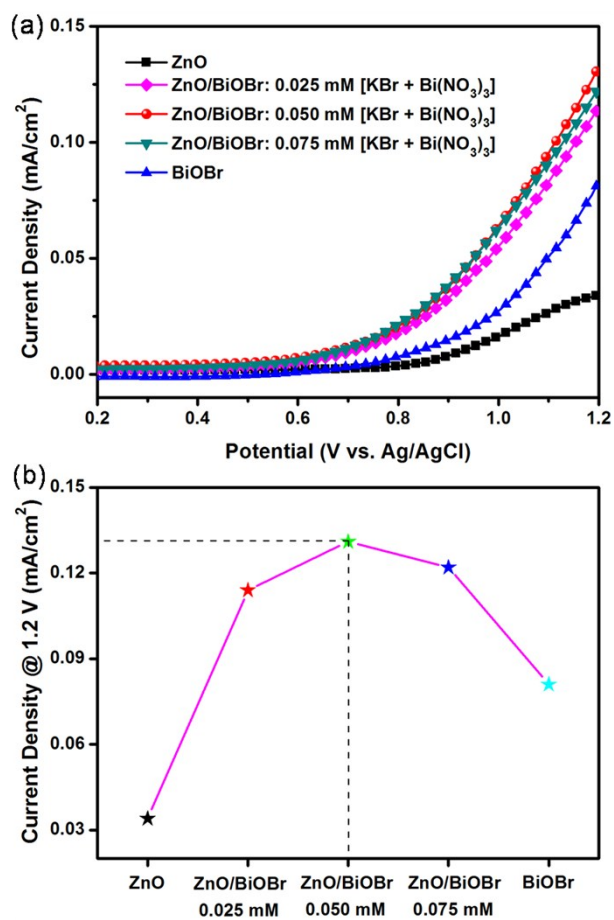

**Fig. S6** (a) Current-potential ( $I$ - $V$ ) curves of ZnO/BiOBr samples with different BiOBr NPs content, (b) optimization curve.

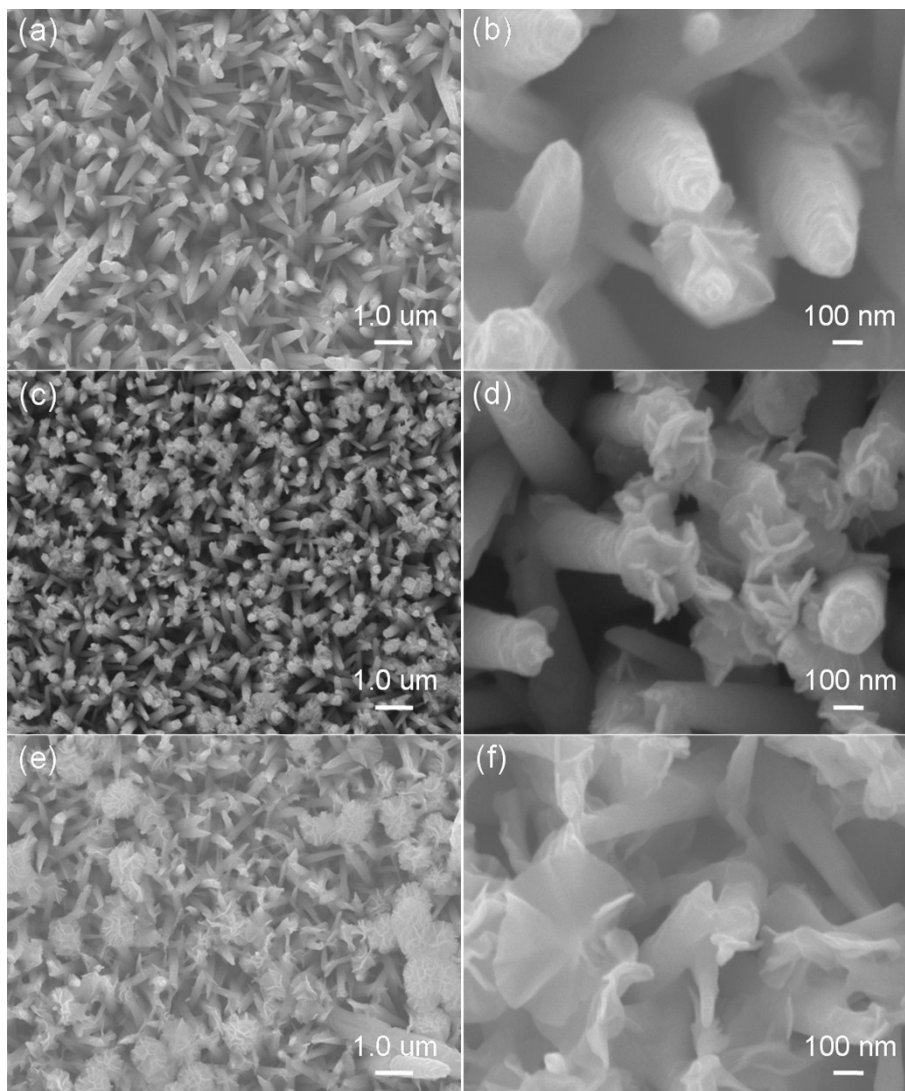

**Fig. S7** SEM images of ZnO/BiOBr samples with different BiOBr NPs content: (a-b) 0.025 mM [KBr + Bi(NO<sub>3</sub>)<sub>3</sub>], (c-d) 0.05 mM [KBr + Bi(NO<sub>3</sub>)<sub>3</sub>], and (e-f) 0.075 mM [KBr + Bi(NO<sub>3</sub>)<sub>3</sub>].

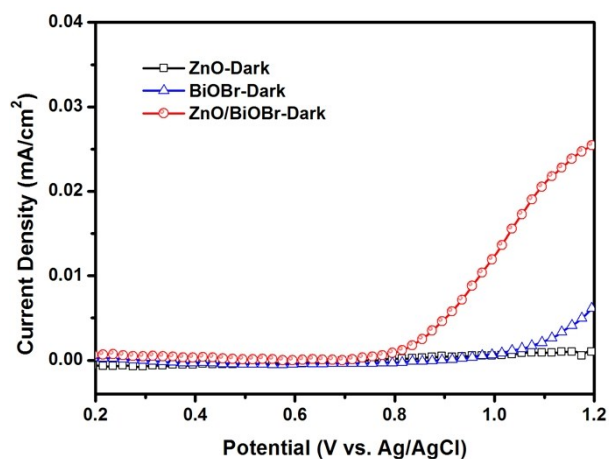

**Fig. S8** Current density versus applied potential curves for the pure ZnO, BiOBr and ZnO/BiOBr photoanodes in dark condition.

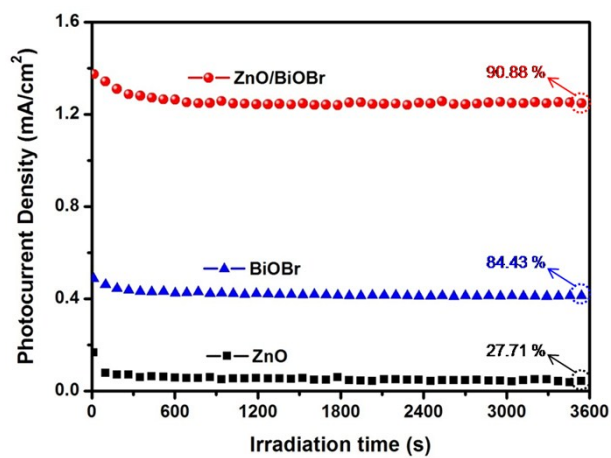

**Fig. S9** Photocurrent density stability test of the as-prepared photoanodes under visible light illumination for 1 h with the applied bias of 0.5 V.



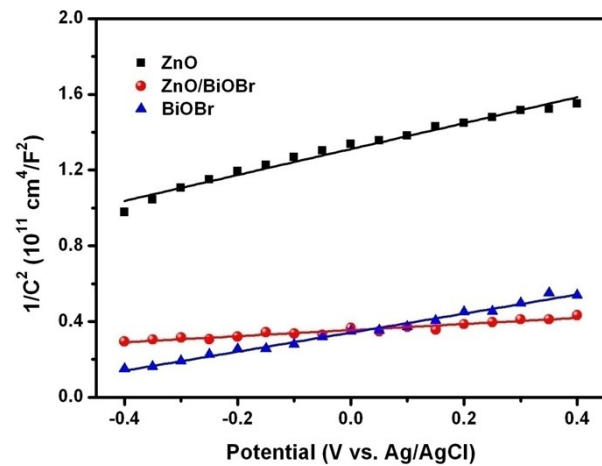

**Fig. S10.** Mott-Schottky plots of the ZnO, BiOBr and ZnO/BiOBr heterostructure in dark at a frequency of 10 KHz and a current of 5 mV with a three-electrode system.

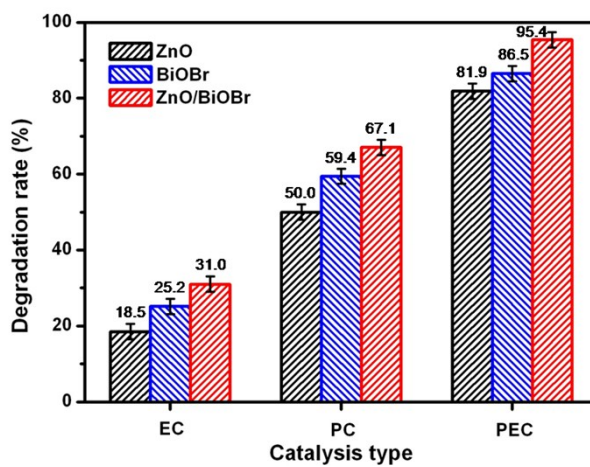

**Fig. S11.** Degradation rates for RhB solution by different catalysis type of ZnO, BiOBr and ZnO/BiOBr photoelectrodes.

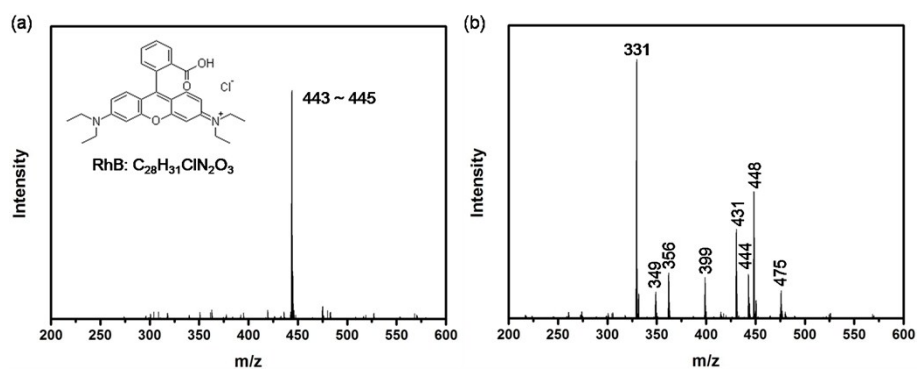

**Fig. S12.** ESI-MS spectra of the RhB solution in the degradation process (a) before and (b) after the light illumination for 100 min.

These peaks may be ascribed to the following decomposition products:

peaks at 443 ~ 445, 448: characteristic of RhB molecule.

peaks at 331, 356: fragments which resulted from severing ethyl group from RhB molecule.

peaks at 349, 431: fragments which resulted from de-ethylation and hydroxylation process.

peaks at 399: fragments which resulted from severing one carboxyl group from RhB molecule.

peaks at 475: fragments which resulted from hydroxylation process by two hydroxyl radicals.

Moreover, these above degradation processes can be concluded to the following two aspects:

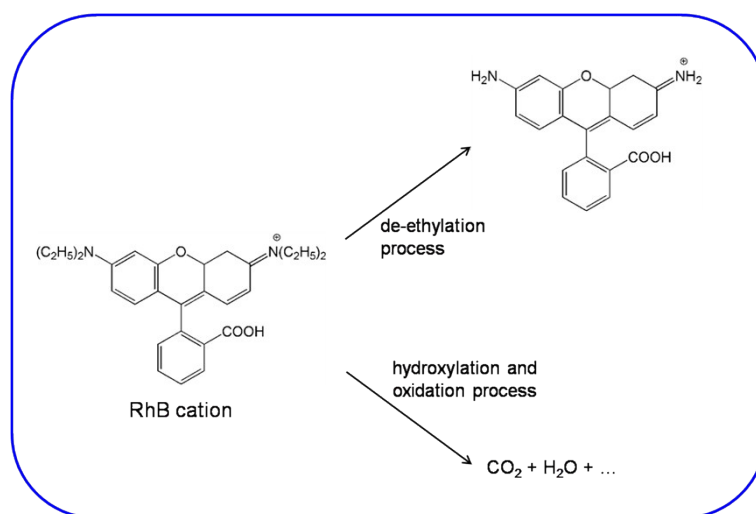

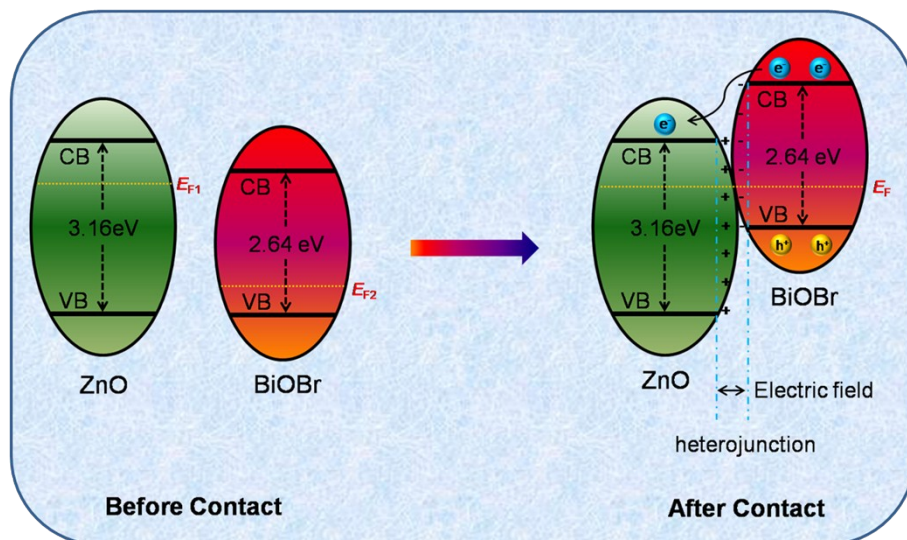

**Fig. S13.** The band structures variation of the two semiconductors before and after contact.

**Table S1** Pseudo-first-order rate constants of RhB solution degradation by different catalysis types.

| Serie | Catalysis type | The first order  |                          | $k(\text{min}^{-1})$ | $R^2$  |
|-------|----------------|------------------|--------------------------|----------------------|--------|
|       |                | Kinetic equation |                          |                      |        |
| 1     |                | ZnO              | $-\ln(C_t/C_0)=0.0021 t$ | 0.0021               | 0.9812 |
| 2     | EC             | BiOBr            | $-\ln(C_t/C_0)=0.0030 t$ | 0.0030               | 0.9876 |
| 3     |                | ZnO/BiOBr        | $-\ln(C_t/C_0)=0.0038 t$ | 0.0038               | 0.9877 |
| ----- |                |                  |                          |                      |        |
| 4     |                | ZnO              | $-\ln(C_t/C_0)=0.0070 t$ | 0.0070               | 0.9782 |
| 5     | PC             | BiOBr            | $-\ln(C_t/C_0)=0.0089 t$ | 0.0089               | 0.9885 |
| 6     |                | ZnO/BiOBr        | $-\ln(C_t/C_0)=0.0112 t$ | 0.0112               | 0.9899 |
| ----- |                |                  |                          |                      |        |
| 7     |                | ZnO              | $-\ln(C_t/C_0)=0.0166 t$ | 0.0166               | 0.9951 |
| 8     | PEC            | BiOBr            | $-\ln(C_t/C_0)=0.0197 t$ | 0.0197               | 0.9985 |
| 9     |                | ZnO/BiOBr        | $-\ln(C_t/C_0)=0.0290 t$ | 0.0290               | 0.9641 |

## References

- [S1] K. Kim, K. L. Kim and K. S. Shin, *Phys. Chem. Chem. Phys.*, 2013, **15**, 9288-9294.
- [S2] X. D. Xue, T. Wang, X. D. Jiang, J. Jiang, C. X. Pan and Y. C. Wu, *CrystEngComm*, 2014, **16**, 1207-1216.
- [S3] D. Zhang, J. Li, Q. G. Wang and Q. S. Wu, *J. Mater. Chem. A*, 2013, **1**, 8622-8629.
- [S4] Y. Lei, G. Wang, S. Song, W. Fan and H. Zhang, *CrystEngComm*, 2009, **11**, 1857-1862.
